# Supplementary material for: New Spirotetronate Antibiotics, Lobophorins H and I, from a South China Sea-Derived Streptomyces sp. 12A35
Source: MDPI journal article supplement (doi:10.3390/md11103891), 2013-10-15
Supplement: s2 [file s2]

marinedrugs-11-03891-s001.mol
  corina  11211302013D 1   1.00000     0.00000 
CORINA 3.49 0023  12.04.2013
 89 97  0  0  0  0  0  0  0  0999 V2000
    5.4461    8.4458    4.8354 C   0  0  0  0  0  0  0  0  0  0  0  0
    4.4332    7.4615    5.4261 C   0  0  0  0  0  0  0  0  0  0  0  0
    3.9571    6.5087    4.3253 C   0  0  0  0  0  0  0  0  0  0  0  0
    5.1716    5.7991    3.7190 C   0  0  0  0  0  0  0  0  0  0  0  0
    6.1560    6.8475    3.1941 C   0  0  0  0  0  0  0  0  0  0  0  0
    6.5347    7.7196    4.2610 O   0  0  0  0  0  0  0  0  0  0  0  0
    8.9662    6.3435    0.9264 C   0  0  0  0  0  0  0  0  0  0  0  0
   10.0221    7.2148    0.2415 C   0  0  0  0  0  0  0  0  0  0  0  0
   11.0130    7.6864    1.3109 C   0  0  0  0  0  0  0  0  0  0  0  0
   10.2863    8.4499    2.4245 C   0  0  0  0  0  0  0  0  0  0  0  0
    9.2464    7.5695    3.1043 C   0  0  0  0  0  0  0  0  0  0  0  0
    8.2551    7.0793    2.0574 C   0  0  0  0  0  0  0  0  0  0  0  0
    7.9194    6.0104   -0.1168 C   0  0  0  0  0  0  0  0  0  0  0  0
    8.3292    5.7629   -1.3166 C   0  0  0  0  0  0  0  0  0  0  0  0
    9.7143    5.7991   -1.8162 C   0  0  0  0  0  0  0  0  0  0  0  0
   10.7183    6.4481   -0.8721 C   0  0  0  0  0  0  0  0  0  0  0  0
    7.3173    6.1944    2.6775 O   0  0  0  0  0  0  0  0  0  0  0  0
    9.3972    5.4173    1.2891 H   0  0  0  0  0  0  0  0  0  0  0  0
    3.0670    5.5401    4.8835 O   0  0  0  0  0  0  0  0  0  0  0  0
    4.7676    9.2884    3.7535 C   0  0  0  0  0  0  0  0  0  0  0  0
    5.0516    6.7107    6.4730 O   0  0  0  0  0  0  0  0  0  0  0  0
    9.9054    6.3926    3.8207 C   0  0  0  0  0  0  0  0  0  0  0  0
   12.0654    8.6492    0.7534 C   0  0  0  0  0  0  0  0  0  0  0  0
    9.5291    8.0989   -0.1828 H   0  0  0  0  0  0  0  0  0  0  0  0
   11.5630    5.3318   -0.2423 C   0  0  0  0  0  0  0  0  0  0  0  0
   10.0460    4.7539   -1.9687 H   0  0  0  0  0  0  0  0  0  0  0  0
    9.7188    6.4475   -3.1781 C   0  0  0  0  0  0  0  0  0  0  0  0
    8.7021    7.5195   -3.4975 C   0  0  0  0  0  0  0  0  0  0  0  0
   10.5787    6.0765   -4.0973 C   0  0  0  0  0  0  0  0  0  0  0  0
   10.5544    6.7054   -5.4640 C   0  0  0  0  0  0  0  0  0  0  0  0
   11.7019    6.1888   -6.3380 C   0  0  0  0  0  0  0  0  0  0  0  0
   11.5750    7.3714   -1.6901 C   0  0  0  0  0  0  0  0  0  0  0  0
   12.9035    7.1139   -2.2079 C   0  0  0  0  0  0  0  0  0  0  0  0
   12.9207    7.0496   -6.0855 C   0  0  0  0  0  0  0  0  0  0  0  0
   13.7231    8.1514   -2.6775 C   0  0  0  0  0  0  0  0  0  0  0  0
   11.0985    8.4712   -1.9701 O   0  0  0  0  0  0  0  0  0  0  0  0
   13.4347    9.4584   -2.6723 O   0  0  0  0  0  0  0  0  0  0  0  0
   13.7539    6.7081   -5.1440 C   0  0  0  0  0  0  0  0  0  0  0  0
   14.9545    7.5210   -4.7497 C   0  0  0  0  0  0  0  0  0  0  0  0
   14.9812    7.5091   -3.2063 C   0  0  0  0  0  0  0  0  0  0  0  0
   16.2172    6.8940   -5.2571 C   0  0  0  0  0  0  0  0  0  0  0  0
   17.3409    6.9282   -4.5599 C   0  0  0  0  0  0  0  0  0  0  0  0
   17.4984    7.5776   -3.2215 C   0  0  0  0  0  0  0  0  0  0  0  0
   16.2230    8.2265   -2.7097 C   0  0  0  0  0  0  0  0  0  0  0  0
   13.6479    5.8709   -2.3919 C   0  0  0  0  0  0  0  0  0  0  0  0
   14.9255    6.1324   -2.7507 O   0  0  0  0  0  0  0  0  0  0  0  0
   13.2232    4.7345   -2.3177 O   0  0  0  0  0  0  0  0  0  0  0  0
   17.9838    6.5362   -2.2106 C   0  0  0  0  0  0  0  0  0  0  0  0
   14.8764    8.5471   -5.0770 H   0  0  0  0  0  0  0  0  0  0  0  0
    9.4090    1.6643   -6.9195 C   0  0  0  0  0  0  0  0  0  0  0  0
   10.8876    1.4573   -7.2616 C   0  0  0  0  0  0  0  0  0  0  0  0
   11.7287    2.4665   -6.4740 C   0  0  0  0  0  0  0  0  0  0  0  0
   11.2497    3.8834   -6.8006 C   0  0  0  0  0  0  0  0  0  0  0  0
    9.8601    3.9989   -6.4877 O   0  0  0  0  0  0  0  0  0  0  0  0
    9.0195    3.1122   -7.2288 C   0  0  0  0  0  0  0  0  0  0  0  0
   11.9925    4.8277   -6.0269 O   0  0  0  0  0  0  0  0  0  0  0  0
   11.4247    6.2699   -7.3911 H   0  0  0  0  0  0  0  0  0  0  0  0
   11.3065    0.0354   -6.8824 C   0  0  0  0  0  0  0  0  0  0  0  0
    9.1914    3.3781   -8.7257 C   0  0  0  0  0  0  0  0  0  0  0  0
    0.7468    2.8625    2.6642 C   0  0  0  0  0  0  0  0  0  0  0  0
    1.7962    3.7470    1.9859 C   0  0  0  0  0  0  0  0  0  0  0  0
    2.6984    4.2543    2.9712 O   0  0  0  0  0  0  0  0  0  0  0  0
    2.0763    5.0661    3.9692 C   0  0  0  0  0  0  0  0  0  0  0  0
    1.0382    4.2346    4.7272 C   0  0  0  0  0  0  0  0  0  0  0  0
    0.0140    3.6804    3.7320 C   0  0  0  0  0  0  0  0  0  0  0  0
   -0.1907    2.4007    1.6895 O   0  0  0  0  0  0  0  0  0  0  0  0
   -0.0854   -1.2246    1.9572 C   0  0  0  0  0  0  0  0  0  0  0  0
   -1.2562   -1.5895    1.0407 C   0  0  0  0  0  0  0  0  0  0  0  0
   -2.4052   -0.6043    1.2765 C   0  0  0  0  0  0  0  0  0  0  0  0
   -1.8991    0.8209    1.0336 C   0  0  0  0  0  0  0  0  0  0  0  0
   -0.7035    1.0926    1.9503 C   0  0  0  0  0  0  0  0  0  0  0  0
    0.3161    0.1228    1.7013 O   0  0  0  0  0  0  0  0  0  0  0  0
    2.5735    2.9207    0.9594 C   0  0  0  0  0  0  0  0  0  0  0  0
   -0.6828    4.7624    3.1108 O   0  0  0  0  0  0  0  0  0  0  0  0
   -3.4746   -0.8922    0.3734 O   0  0  0  0  0  0  0  0  0  0  0  0
   -0.8361   -1.5157   -0.3231 O   0  0  0  0  0  0  0  0  0  0  0  0
   -0.5198   -1.3589    3.4180 C   0  0  0  0  0  0  0  0  0  0  0  0
   -0.3074   -2.7404   -0.8355 C   0  0  0  0  0  0  0  0  0  0  0  0
   13.1392    8.2659   -6.9442 C   0  0  0  0  0  0  0  0  0  0  0  0
    8.5863    0.7519   -7.7248 N   0  0  0  0  0  0  0  0  0  0  0  0
    7.4959    0.4224   -7.0902 O   0  0  0  0  0  0  0  0  0  0  0  0
    6.6528   -0.4112   -7.7194 C   0  0  0  0  0  0  0  0  0  0  0  0
    6.9205   -0.8209   -8.8241 O   0  0  0  0  0  0  0  0  0  0  0  0
    5.3723   -0.8363   -7.0479 C   0  0  0  0  0  0  0  0  0  0  0  0
   18.5144    6.2804   -5.1463 C   0  0  0  0  0  0  0  0  0  0  0  0
   19.5704    6.2825   -4.5490 O   0  0  0  0  0  0  0  0  0  0  0  0
   11.0920    1.6638   -8.6975 N   0  3  0  0  0  0  0  0  0  0  0  0
   11.9497    2.4365   -9.0856 O   0  0  0  0  0  0  0  0  0  0  0  0
   10.4041    1.0627   -9.5031 O   0  5  0  0  0  0  0  0  0  0  0  0
  1  2  1  0      
  2  3  1  0      
  3  4  1  0      
  4  5  1  0      
  5  6  1  0      
  6  1  1  0      
  7  8  1  0      
  8  9  1  0      
  9 10  1  0      
 10 11  1  0      
 11 12  1  0      
 12  7  1  0      
  7 13  1  0      
 13 14  2  0      
 14 15  1  0      
 15 16  1  0      
 16  8  1  0      
  5 17  1  0      
  7 18  1  0      
  3 19  1  0      
  1 20  1  0      
  2 21  1  0      
 12 17  1  0      
 11 22  1  0      
  9 23  1  0      
  8 24  1  0      
 16 25  1  0      
 15 26  1  0      
 15 27  1  0      
 27 28  1  0      
 27 29  2  0      
 29 30  1  0      
 30 31  1  0      
 16 32  1  0      
 32 33  1  0      
 31 34  1  0      
 33 35  2  0      
 32 36  2  0      
 35 37  1  0      
 34 38  2  0      
 38 39  1  0      
 39 40  1  0      
 39 41  1  0      
 41 42  2  0      
 42 43  1  0      
 43 44  1  0      
 44 40  1  0      
 33 45  1  0      
 40 46  1  0      
 45 46  1  0      
 45 47  2  0      
 43 48  1  0      
 39 49  1  0      
 50 51  1  0      
 51 52  1  0      
 52 53  1  0      
 53 54  1  0      
 54 55  1  0      
 55 50  1  0      
 31 56  1  0      
 53 56  1  0      
 31 57  1  0      
 51 58  1  0      
 55 59  1  0      
 40 35  1  0      
 60 61  1  0      
 61 62  1  0      
 62 63  1  0      
 63 64  1  0      
 64 65  1  0      
 65 60  1  0      
 63 19  1  0      
 60 66  1  0      
 67 68  1  0      
 68 69  1  0      
 69 70  1  0      
 70 71  1  0      
 71 72  1  0      
 72 67  1  0      
 66 71  1  0      
 61 73  1  0      
 65 74  1  0      
 69 75  1  0      
 68 76  1  0      
 67 77  1  0      
 76 78  1  0      
 34 79  1  0      
 50 80  1  0      
 80 81  1  0      
 81 82  1  0      
 82 83  2  0      
 82 84  1  0      
 42 85  1  0      
 85 86  2  0      
 51 87  1  0      
 87 88  2  0      
 87 89  1  0      
M  CHG  2  87   1  89  -1
M  STY  1   1 SUP
M  SLB  1   1   1
M  SAL   1  5  80  81  82  83  84
M  SBL   1  1  88
M  SMT   1 NHOCOCH3
M  SBV   1 88   -6.3634    9.2914
M  STY  1   2 SUP
M  SLB  1   2   2
M  SAL   2  2  85  86
M  SBL   2  1  93
M  SMT   2 CHO
M  SBV   2 93   -6.7199    8.6729
M  STY  1   3 SUP
M  SLB  1   3   3
M  SAL   3  3  87  88  89
M  SBL   3  1  95
M  SMT   3 NO2
M  SBV   3 95   -6.3634    8.0548
M  END
$$$$
