# Supplementary material for: New Spirotetronate Antibiotics, Lobophorins H and I, from a South China Sea-Derived Streptomyces sp. 12A35
Source: MDPI journal article supplement (doi:10.3390/md11103891), 2013-10-15
Supplement: s3 [file s3]

marinedrugs-11-03891-s001.mol
  ChemDraw11081309302D

 89 97  0  0  0  0  0  0  0  0999 V2000
    1.3919    3.2263    0.0000 C   0  0  0  0  0  0  0  0  0  0  0  0
    0.9794    2.5119    0.0000 C   0  0  0  0  0  0  0  0  0  0  0  0
    1.7727    2.7386    0.0000 C   0  0  0  0  0  0  0  0  0  0  0  0
    2.5707    2.5119    0.0000 C   0  0  0  0  0  0  0  0  0  0  0  0
    2.9833    3.2263    0.0000 C   0  0  0  0  0  0  0  0  0  0  0  0
    2.1900    2.9997    0.0000 O   0  0  0  0  0  0  0  0  0  0  0  0
    3.1736    1.7219    0.0000 C   0  0  0  0  0  0  0  0  0  0  0  0
    3.1736    0.8969    0.0000 C   0  0  0  0  0  0  0  0  0  0  0  0
    3.8881    0.4844    0.0000 C   0  0  0  0  0  0  0  0  0  0  0  0
    4.6025    0.8969    0.0000 C   0  0  0  0  0  0  0  0  0  0  0  0
    4.6025    1.7219    0.0000 C   0  0  0  0  0  0  0  0  0  0  0  0
    3.8881    2.1344    0.0000 C   0  0  0  0  0  0  0  0  0  0  0  0
    2.4591    2.1344    0.0000 C   0  0  0  0  0  0  0  0  0  0  0  0
    1.7447    1.7219    0.0000 C   0  0  0  0  0  0  0  0  0  0  0  0
    1.7447    0.8969    0.0000 C   0  0  0  0  0  0  0  0  0  0  0  0
    2.4591    0.4844    0.0000 C   0  0  0  0  0  0  0  0  0  0  0  0
    2.9833    4.0513    0.0000 O   0  0  0  0  0  0  0  0  0  0  0  0
    3.1736    2.5469    0.0000 H   0  0  0  0  0  0  0  0  0  0  0  0
    1.7727    3.5636    0.0000 O   0  0  0  0  0  0  0  0  0  0  0  0
    0.5950    3.0128    0.0000 C   0  0  0  0  0  0  0  0  0  0  0  0
    0.1825    2.7254    0.0000 O   0  0  0  0  0  0  0  0  0  0  0  0
    5.3170    2.1344    0.0000 C   0  0  0  0  0  0  0  0  0  0  0  0
    3.8881   -0.3406    0.0000 C   0  0  0  0  0  0  0  0  0  0  0  0
    3.1736    0.0719    0.0000 H   0  0  0  0  0  0  0  0  0  0  0  0
    2.2456    1.2813    0.0000 C   0  0  0  0  0  0  0  0  0  0  0  0
    1.7447    0.0719    0.0000 H   0  0  0  0  0  0  0  0  0  0  0  0
    1.0302    0.4844    0.0000 C   0  0  0  0  0  0  0  0  0  0  0  0
    0.4468    1.0678    0.0000 C   0  0  0  0  0  0  0  0  0  0  0  0
    1.0302   -0.3406    0.0000 C   0  0  0  0  0  0  0  0  0  0  0  0
    0.4468   -0.9239    0.0000 C   0  0  0  0  0  0  0  0  0  0  0  0
    0.4468   -1.7489    0.0000 C   0  0  0  0  0  0  0  0  0  0  0  0
    2.4591   -0.3406    0.0000 C   0  0  0  0  0  0  0  0  0  0  0  0
    3.1043   -0.9799    0.0000 C   0  0  0  0  0  0  0  0  0  0  0  0
    1.1613   -2.1614    0.0000 C   0  0  0  0  0  0  0  0  0  0  0  0
    2.4650   -1.9081    0.0000 C   0  0  0  0  0  0  0  0  0  0  0  0
    2.0466   -1.0550    0.0000 O   0  0  0  0  0  0  0  0  0  0  0  0
    1.9700   -1.6399    0.0000 O   0  0  0  0  0  0  0  0  0  0  0  0
    1.1613   -2.9864    0.0000 C   0  0  0  0  0  0  0  0  0  0  0  0
    1.8758   -3.3989    0.0000 C   0  0  0  0  0  0  0  0  0  0  0  0
    2.5902   -2.9864    0.0000 C   0  0  0  0  0  0  0  0  0  0  0  0
    1.8758   -4.2239    0.0000 C   0  0  0  0  0  0  0  0  0  0  0  0
    2.5902   -4.6364    0.0000 C   0  0  0  0  0  0  0  0  0  0  0  0
    3.3047   -4.2239    0.0000 C   0  0  0  0  0  0  0  0  0  0  0  0
    3.3047   -3.3989    0.0000 C   0  0  0  0  0  0  0  0  0  0  0  0
    3.9706   -1.3099    0.0000 C   0  0  0  0  0  0  0  0  0  0  0  0
    3.7437   -2.3824    0.0000 O   0  0  0  0  0  0  0  0  0  0  0  0
    4.6850   -0.8974    0.0000 O   0  0  0  0  0  0  0  0  0  0  0  0
    3.8881   -4.8073    0.0000 C   0  0  0  0  0  0  0  0  0  0  0  0
    1.1613   -3.8114    0.0000 H   0  0  0  0  0  0  0  0  0  0  0  0
   -2.8156   -1.3499    0.0000 C   0  0  0  0  0  0  0  0  0  0  0  0
   -2.4031   -2.0644    0.0000 C   0  0  0  0  0  0  0  0  0  0  0  0
   -1.6050   -1.8553    0.0000 C   0  0  0  0  0  0  0  0  0  0  0  0
   -0.8118   -2.0644    0.0000 C   0  0  0  0  0  0  0  0  0  0  0  0
   -1.2242   -1.3499    0.0000 O   0  0  0  0  0  0  0  0  0  0  0  0
   -2.0223   -1.5589    0.0000 C   0  0  0  0  0  0  0  0  0  0  0  0
   -0.3501   -1.5354    0.0000 O   0  0  0  0  0  0  0  0  0  0  0  0
    0.0343   -2.4634    0.0000 H   0  0  0  0  0  0  0  0  0  0  0  0
   -3.2000   -1.8509    0.0000 C   0  0  0  0  0  0  0  0  0  0  0  0
   -2.4348   -0.8445    0.0000 C   0  0  0  0  0  0  0  0  0  0  0  0
   -0.4437    4.9613    0.0000 C   0  0  0  0  0  0  0  0  0  0  0  0
   -0.0312    4.2468    0.0000 C   0  0  0  0  0  0  0  0  0  0  0  0
    0.7669    4.4559    0.0000 O   0  0  0  0  0  0  0  0  0  0  0  0
    1.5601    4.2468    0.0000 C   0  0  0  0  0  0  0  0  0  0  0  0
    1.1477    4.9613    0.0000 C   0  0  0  0  0  0  0  0  0  0  0  0
    0.3495    4.7523    0.0000 C   0  0  0  0  0  0  0  0  0  0  0  0
   -1.1582    4.5488    0.0000 O   0  0  0  0  0  0  0  0  0  0  0  0
   -3.4756    4.9176    0.0000 C   0  0  0  0  0  0  0  0  0  0  0  0
   -3.8881    4.2031    0.0000 C   0  0  0  0  0  0  0  0  0  0  0  0
   -3.0948    4.4298    0.0000 C   0  0  0  0  0  0  0  0  0  0  0  0
   -2.2968    4.2031    0.0000 C   0  0  0  0  0  0  0  0  0  0  0  0
   -1.8842    4.9176    0.0000 C   0  0  0  0  0  0  0  0  0  0  0  0
   -2.6775    4.6909    0.0000 O   0  0  0  0  0  0  0  0  0  0  0  0
   -0.8562    4.2468    0.0000 C   0  0  0  0  0  0  0  0  0  0  0  0
    0.3495    3.9273    0.0000 O   0  0  0  0  0  0  0  0  0  0  0  0
   -3.0948    5.2548    0.0000 O   0  0  0  0  0  0  0  0  0  0  0  0
   -4.6025    4.6156    0.0000 O   0  0  0  0  0  0  0  0  0  0  0  0
   -4.3006    4.9176    0.0000 C   0  0  0  0  0  0  0  0  0  0  0  0
   -5.3170    4.2031    0.0000 C   0  0  0  0  0  0  0  0  0  0  0  0
    1.3748   -1.3645    0.0000 C   0  0  0  0  0  0  0  0  0  0  0  0
   -2.8164   -0.9373    0.0000 N   0  0  0  0  0  0  0  0  0  0  0  0
   -2.1020   -1.3498    0.0000 O   0  0  0  0  0  0  0  0  0  0  0  0
   -1.3875   -0.9373    0.0000 C   0  0  0  0  0  0  0  0  0  0  0  0
   -1.3875   -0.1123    0.0000 O   0  0  0  0  0  0  0  0  0  0  0  0
   -0.6730   -1.3498    0.0000 C   0  0  0  0  0  0  0  0  0  0  0  0
    2.2328   -4.8423    0.0000 C   0  0  0  0  0  0  0  0  0  0  0  0
    2.9473   -5.2548    0.0000 O   0  0  0  0  0  0  0  0  0  0  0  0
   -2.4039   -2.8884    0.0000 N   0  3  0  0  0  0  0  0  0  0  0  0
   -1.6895   -3.3009    0.0000 O   0  0  0  0  0  0  0  0  0  0  0  0
   -3.1184   -3.3009    0.0000 O   0  5  0  0  0  0  0  0  0  0  0  0
  1  2  1  0      
  2  3  1  0      
  3  4  1  0      
  4  5  1  0      
  5  6  1  0      
  6  1  1  0      
  7  8  1  0      
  8  9  1  0      
  9 10  1  0      
 10 11  1  0      
 11 12  1  0      
 12  7  1  0      
  7 13  1  0      
 13 14  2  0      
 14 15  1  0      
 15 16  1  0      
 16  8  1  0      
  5 17  1  1      
  7 18  1  1      
  3 19  1  0      
  1 20  1  0      
  2 21  1  0      
 12 17  1  1      
 11 22  1  1      
  9 23  1  6      
  8 24  1  6      
 16 25  1  1      
 15 26  1  1      
 15 27  1  0      
 27 28  1  0      
 27 29  2  0      
 29 30  1  0      
 30 31  1  0      
 16 32  1  0      
 32 33  1  0      
 31 34  1  0      
 33 35  2  0      
 32 36  2  0      
 35 37  1  0      
 34 38  2  0      
 38 39  1  0      
 39 40  1  0      
 39 41  1  0      
 41 42  2  0      
 42 43  1  0      
 43 44  1  0      
 44 40  1  0      
 33 45  1  0      
 40 46  1  1      
 45 46  1  0      
 45 47  2  0      
 43 48  1  1      
 39 49  1  6      
 50 51  1  0      
 51 52  1  0      
 52 53  1  0      
 53 54  1  0      
 54 55  1  0      
 55 50  1  0      
 31 56  1  0      
 53 56  1  0      
 31 57  1  6      
 51 58  1  0      
 55 59  1  0      
 40 35  1  6      
 60 61  1  0      
 61 62  1  0      
 62 63  1  0      
 63 64  1  0      
 64 65  1  0      
 65 60  1  0      
 63 19  1  0      
 60 66  1  0      
 67 68  1  0      
 68 69  1  0      
 69 70  1  0      
 70 71  1  0      
 71 72  1  0      
 72 67  1  0      
 66 71  1  0      
 61 73  1  0      
 65 74  1  0      
 69 75  1  0      
 68 76  1  0      
 67 77  1  0      
 76 78  1  0      
 34 79  1  0      
 50 80  1  0      
 80 81  1  0      
 81 82  1  0      
 82 83  2  0      
 82 84  1  0      
 42 85  1  0      
 85 86  2  0      
 51 87  1  0      
 87 88  2  0      
 87 89  1  0      
M  CHG  2  87   1  89  -1
M  STY  1   1 SUP
M  SLB  1   1   1
M  SAL   1  5  80  81  82  83  84
M  SBL   1  1  88
M  SMT   1 NHOCOCH3
M  SBV   1 88   -6.3634    9.2914
M  STY  1   2 SUP
M  SLB  1   2   2
M  SAL   2  2  85  86
M  SBL   2  1  93
M  SMT   2 CHO
M  SBV   2 93   -6.7199    8.6729
M  STY  1   3 SUP
M  SLB  1   3   3
M  SAL   3  3  87  88  89
M  SBL   3  1  95
M  SMT   3 NO2
M  SBV   3 95   -6.3634    8.0548
M  END
