# Supplementary material for: New Spirotetronate Antibiotics, Lobophorins H and I, from a South China Sea-Derived Streptomyces sp. 12A35
Source: MDPI journal article supplement (doi:10.3390/md11103891), 2013-10-15
Supplement: s5 [file s5]

marinedrugs-11-03891-s002.mol
  ChemDraw11081309312D

 70 76  0  0  0  0  0  0  0  0999 V2000
    0.3334    4.1376    0.0000 C   0  0  0  0  0  0  0  0  0  0  0  0
   -0.0791    3.4232    0.0000 C   0  0  0  0  0  0  0  0  0  0  0  0
    0.7141    3.6499    0.0000 C   0  0  0  0  0  0  0  0  0  0  0  0
    1.5122    3.4232    0.0000 C   0  0  0  0  0  0  0  0  0  0  0  0
    1.9248    4.1376    0.0000 C   0  0  0  0  0  0  0  0  0  0  0  0
    1.1315    3.9110    0.0000 O   0  0  0  0  0  0  0  0  0  0  0  0
    2.1151    2.6332    0.0000 C   0  0  0  0  0  0  0  0  0  0  0  0
    2.1151    1.8082    0.0000 C   0  0  0  0  0  0  0  0  0  0  0  0
    2.8295    1.3957    0.0000 C   0  0  0  0  0  0  0  0  0  0  0  0
    3.5440    1.8082    0.0000 C   0  0  0  0  0  0  0  0  0  0  0  0
    3.5440    2.6332    0.0000 C   0  0  0  0  0  0  0  0  0  0  0  0
    2.8295    3.0457    0.0000 C   0  0  0  0  0  0  0  0  0  0  0  0
    1.4006    3.0457    0.0000 C   0  0  0  0  0  0  0  0  0  0  0  0
    0.6861    2.6332    0.0000 C   0  0  0  0  0  0  0  0  0  0  0  0
    0.6861    1.8082    0.0000 C   0  0  0  0  0  0  0  0  0  0  0  0
    1.4006    1.3957    0.0000 C   0  0  0  0  0  0  0  0  0  0  0  0
    1.9248    4.9626    0.0000 O   0  0  0  0  0  0  0  0  0  0  0  0
    2.1151    3.4582    0.0000 H   0  0  0  0  0  0  0  0  0  0  0  0
    0.7141    4.4749    0.0000 O   0  0  0  0  0  0  0  0  0  0  0  0
   -0.4635    3.9241    0.0000 C   0  0  0  0  0  0  0  0  0  0  0  0
   -0.8760    3.6367    0.0000 O   0  0  0  0  0  0  0  0  0  0  0  0
    4.2585    3.0457    0.0000 C   0  0  0  0  0  0  0  0  0  0  0  0
    2.8295    0.5707    0.0000 C   0  0  0  0  0  0  0  0  0  0  0  0
    2.1151    0.9832    0.0000 H   0  0  0  0  0  0  0  0  0  0  0  0
    1.1871    2.1926    0.0000 C   0  0  0  0  0  0  0  0  0  0  0  0
    0.6861    0.9832    0.0000 H   0  0  0  0  0  0  0  0  0  0  0  0
   -0.0283    1.3957    0.0000 C   0  0  0  0  0  0  0  0  0  0  0  0
   -0.6117    1.9791    0.0000 C   0  0  0  0  0  0  0  0  0  0  0  0
   -0.0283    0.5707    0.0000 C   0  0  0  0  0  0  0  0  0  0  0  0
   -0.6117   -0.0126    0.0000 C   0  0  0  0  0  0  0  0  0  0  0  0
   -0.6117   -0.8376    0.0000 C   0  0  0  0  0  0  0  0  0  0  0  0
    1.4006    0.5707    0.0000 C   0  0  0  0  0  0  0  0  0  0  0  0
    2.0458   -0.0686    0.0000 C   0  0  0  0  0  0  0  0  0  0  0  0
    0.1028   -1.2501    0.0000 C   0  0  0  0  0  0  0  0  0  0  0  0
    1.4064   -0.9968    0.0000 C   0  0  0  0  0  0  0  0  0  0  0  0
    0.9881   -0.1437    0.0000 O   0  0  0  0  0  0  0  0  0  0  0  0
    0.9114   -0.7286    0.0000 O   0  0  0  0  0  0  0  0  0  0  0  0
    0.1028   -2.0751    0.0000 C   0  0  0  0  0  0  0  0  0  0  0  0
    0.8172   -2.4876    0.0000 C   0  0  0  0  0  0  0  0  0  0  0  0
    1.5317   -2.0751    0.0000 C   0  0  0  0  0  0  0  0  0  0  0  0
    0.8172   -3.3126    0.0000 C   0  0  0  0  0  0  0  0  0  0  0  0
    1.5317   -3.7251    0.0000 C   0  0  0  0  0  0  0  0  0  0  0  0
    2.2462   -3.3126    0.0000 C   0  0  0  0  0  0  0  0  0  0  0  0
    2.2462   -2.4876    0.0000 C   0  0  0  0  0  0  0  0  0  0  0  0
    2.9120   -0.3986    0.0000 C   0  0  0  0  0  0  0  0  0  0  0  0
    2.6852   -1.4711    0.0000 O   0  0  0  0  0  0  0  0  0  0  0  0
    3.6265    0.0139    0.0000 O   0  0  0  0  0  0  0  0  0  0  0  0
    2.8295   -3.8960    0.0000 C   0  0  0  0  0  0  0  0  0  0  0  0
    1.5317   -4.5501    0.0000 C   0  0  0  0  0  0  0  0  0  0  0  0
    2.2462   -4.9626    0.0000 O   0  0  0  0  0  0  0  0  0  0  0  0
    0.1028   -2.9001    0.0000 H   0  0  0  0  0  0  0  0  0  0  0  0
   -3.8741   -0.4386    0.0000 C   0  0  0  0  0  0  0  0  0  0  0  0
   -3.4616   -1.1531    0.0000 C   0  0  0  0  0  0  0  0  0  0  0  0
   -2.6635   -0.9440    0.0000 C   0  0  0  0  0  0  0  0  0  0  0  0
   -1.8703   -1.1531    0.0000 C   0  0  0  0  0  0  0  0  0  0  0  0
   -2.2827   -0.4386    0.0000 O   0  0  0  0  0  0  0  0  0  0  0  0
   -3.0809   -0.6476    0.0000 C   0  0  0  0  0  0  0  0  0  0  0  0
   -1.4086   -0.6241    0.0000 O   0  0  0  0  0  0  0  0  0  0  0  0
   -1.0242   -1.5521    0.0000 H   0  0  0  0  0  0  0  0  0  0  0  0
   -4.2585   -0.9396    0.0000 C   0  0  0  0  0  0  0  0  0  0  0  0
   -3.4934    0.0668    0.0000 C   0  0  0  0  0  0  0  0  0  0  0  0
    0.3163   -0.4532    0.0000 C   0  0  0  0  0  0  0  0  0  0  0  0
   -3.8750   -0.0260    0.0000 N   0  0  0  0  0  0  0  0  0  0  0  0
   -3.1605   -0.4385    0.0000 O   0  0  0  0  0  0  0  0  0  0  0  0
   -2.4460   -0.0260    0.0000 C   0  0  0  0  0  0  0  0  0  0  0  0
   -2.4460    0.7990    0.0000 O   0  0  0  0  0  0  0  0  0  0  0  0
   -1.7315   -0.4385    0.0000 C   0  0  0  0  0  0  0  0  0  0  0  0
   -3.4625   -1.9771    0.0000 N   0  3  0  0  0  0  0  0  0  0  0  0
   -2.7480   -2.3896    0.0000 O   0  0  0  0  0  0  0  0  0  0  0  0
   -4.1769   -2.3896    0.0000 O   0  5  0  0  0  0  0  0  0  0  0  0
  1  2  1  0      
  2  3  1  0      
  3  4  1  0      
  4  5  1  0      
  5  6  1  0      
  6  1  1  0      
  7  8  1  0      
  8  9  1  0      
  9 10  1  0      
 10 11  1  0      
 11 12  1  0      
 12  7  1  0      
  7 13  1  0      
 13 14  2  0      
 14 15  1  0      
 15 16  1  0      
 16  8  1  0      
  5 17  1  1      
  7 18  1  1      
  3 19  1  0      
  1 20  1  0      
  2 21  1  0      
 12 17  1  1      
 11 22  1  1      
  9 23  1  6      
  8 24  1  6      
 16 25  1  1      
 15 26  1  1      
 15 27  1  0      
 27 28  1  0      
 27 29  2  0      
 29 30  1  0      
 30 31  1  0      
 16 32  1  0      
 32 33  1  0      
 31 34  1  0      
 33 35  2  0      
 32 36  2  0      
 35 37  1  0      
 34 38  2  0      
 38 39  1  0      
 39 40  1  0      
 39 41  1  0      
 41 42  2  0      
 42 43  1  0      
 43 44  1  0      
 44 40  1  0      
 33 45  1  0      
 40 46  1  1      
 45 46  1  0      
 45 47  2  0      
 43 48  1  1      
 42 49  1  0      
 49 50  1  0      
 39 51  1  6      
 52 53  1  0      
 53 54  1  0      
 54 55  1  0      
 55 56  1  0      
 56 57  1  0      
 57 52  1  0      
 31 58  1  0      
 55 58  1  0      
 31 59  1  6      
 53 60  1  0      
 57 61  1  0      
 40 35  1  6      
 34 62  1  0      
 52 63  1  0      
 63 64  1  0      
 64 65  1  0      
 65 66  2  0      
 65 67  1  0      
 53 68  1  0      
 68 69  2  0      
 68 70  1  0      
M  CHG  2  68   1  70  -1
M  STY  1   1 SUP
M  SLB  1   1   1
M  SAL   1  5  63  64  65  66  67
M  SBL   1  1  69
M  SMT   1 NHOCOCH3
M  SBV   1 69   -7.4013    8.1815
M  STY  1   2 SUP
M  SLB  1   2   2
M  SAL   2  3  68  69  70
M  SBL   2  1  74
M  SMT   2 NO2
M  SBV   2 74   -7.4013    6.9448
M  END
