# Supplementary material for: New Spirotetronate Antibiotics, Lobophorins H and I, from a South China Sea-Derived Streptomyces sp. 12A35
Source: MDPI journal article supplement (doi:10.3390/md11103891), 2013-10-15
Supplement: s6 [file s6]

marinedrugs-11-03891-s003.mol
  corina  11211302043D 1   1.00000     0.00000 
CORINA 3.49 0023  12.04.2013
 61 66  0  0  0  0  0  0  0  0999 V2000
   -1.7514   -0.9662    3.4340 C   0  0  0  0  0  0  0  0  0  0  0  0
   -2.8893   -1.9955    3.4173 C   0  0  0  0  0  0  0  0  0  0  0  0
   -3.2327   -2.3397    4.8714 C   0  0  0  0  0  0  0  0  0  0  0  0
   -2.0003   -2.8778    5.6088 C   0  0  0  0  0  0  0  0  0  0  0  0
   -0.8759   -1.8494    5.6212 C   0  0  0  0  0  0  0  0  0  0  0  0
   -0.5252   -1.4814    4.1835 C   0  0  0  0  0  0  0  0  0  0  0  0
   -1.3302   -0.7360    1.9982 C   0  0  0  0  0  0  0  0  0  0  0  0
   -2.2597   -0.7131    1.1004 C   0  0  0  0  0  0  0  0  0  0  0  0
   -3.7041   -0.9235    1.2947 C   0  0  0  0  0  0  0  0  0  0  0  0
   -4.0949   -1.4581    2.6657 C   0  0  0  0  0  0  0  0  0  0  0  0
   -2.0845   -0.0266    3.8567 H   0  0  0  0  0  0  0  0  0  0  0  0
   -1.2754   -0.6076    6.4141 C   0  0  0  0  0  0  0  0  0  0  0  0
   -4.2988   -3.4342    4.9791 C   0  0  0  0  0  0  0  0  0  0  0  0
   -2.5251   -2.9069    2.9256 H   0  0  0  0  0  0  0  0  0  0  0  0
   -4.7004   -0.3005    3.4708 C   0  0  0  0  0  0  0  0  0  0  0  0
   -4.2029    0.0589    1.1803 H   0  0  0  0  0  0  0  0  0  0  0  0
   -4.2209   -1.7970    0.1812 C   0  0  0  0  0  0  0  0  0  0  0  0
   -3.3174   -2.8466   -0.4241 C   0  0  0  0  0  0  0  0  0  0  0  0
   -5.4385   -1.6407   -0.2835 C   0  0  0  0  0  0  0  0  0  0  0  0
   -5.9464   -2.4870   -1.4181 C   0  0  0  0  0  0  0  0  0  0  0  0
   -7.4165   -2.1848   -1.7227 C   0  0  0  0  0  0  0  0  0  0  0  0
   -5.1119   -2.5414    2.4538 C   0  0  0  0  0  0  0  0  0  0  0  0
   -6.5540   -2.4258    2.5781 C   0  0  0  0  0  0  0  0  0  0  0  0
   -8.2759   -3.0453   -0.8217 C   0  0  0  0  0  0  0  0  0  0  0  0
   -7.3680   -3.5625    2.6869 C   0  0  0  0  0  0  0  0  0  0  0  0
   -4.6888   -3.6494    2.1213 O   0  0  0  0  0  0  0  0  0  0  0  0
   -6.9554   -4.8359    2.7421 O   0  0  0  0  0  0  0  0  0  0  0  0
   -8.6540   -2.5740    0.3304 C   0  0  0  0  0  0  0  0  0  0  0  0
   -9.4506   -3.3582    1.3362 C   0  0  0  0  0  0  0  0  0  0  0  0
   -8.7931   -3.0754    2.7069 C   0  0  0  0  0  0  0  0  0  0  0  0
  -10.8712   -2.8869    1.3794 C   0  0  0  0  0  0  0  0  0  0  0  0
  -11.5508   -2.8539    2.4839 C   0  0  0  0  0  0  0  0  0  0  0  0
  -11.0390   -3.2670    3.8256 C   0  0  0  0  0  0  0  0  0  0  0  0
   -9.5963   -3.7501    3.8020 C   0  0  0  0  0  0  0  0  0  0  0  0
   -7.4391   -1.2666    2.5903 C   0  0  0  0  0  0  0  0  0  0  0  0
   -8.7044   -1.6402    2.8917 O   0  0  0  0  0  0  0  0  0  0  0  0
   -7.1594   -0.1169    2.3124 O   0  0  0  0  0  0  0  0  0  0  0  0
  -11.1681   -2.0932    4.7984 C   0  0  0  0  0  0  0  0  0  0  0  0
  -12.9728   -2.3567    2.4055 C   0  0  0  0  0  0  0  0  0  0  0  0
  -13.2822   -2.0096    1.0542 O   0  0  0  0  0  0  0  0  0  0  0  0
   -9.4049   -4.4214    1.1547 H   0  0  0  0  0  0  0  0  0  0  0  0
   -6.1922    2.2666   -3.9022 C   0  0  0  0  0  0  0  0  0  0  0  0
   -7.6799    2.3438   -3.5458 C   0  0  0  0  0  0  0  0  0  0  0  0
   -7.9495    1.4510   -2.3306 C   0  0  0  0  0  0  0  0  0  0  0  0
   -7.5013    0.0219   -2.6477 C   0  0  0  0  0  0  0  0  0  0  0  0
   -6.1167    0.0256   -3.0009 O   0  0  0  0  0  0  0  0  0  0  0  0
   -5.8119    0.8060   -4.1586 C   0  0  0  0  0  0  0  0  0  0  0  0
   -7.6979   -0.8052   -1.4990 O   0  0  0  0  0  0  0  0  0  0  0  0
   -7.6301   -2.4354   -2.7633 H   0  0  0  0  0  0  0  0  0  0  0  0
   -8.0518    3.7897   -3.2111 C   0  0  0  0  0  0  0  0  0  0  0  0
   -6.6041    0.2750   -5.3550 C   0  0  0  0  0  0  0  0  0  0  0  0
    0.4805   -0.4640    4.1889 O   0  0  0  0  0  0  0  0  0  0  0  0
   -8.6809   -4.4170   -1.2965 C   0  0  0  0  0  0  0  0  0  0  0  0
   -5.9353    3.0603   -5.1114 N   0  0  0  0  0  0  0  0  0  0  0  0
   -4.7246    3.5445   -5.1040 O   0  0  0  0  0  0  0  0  0  0  0  0
   -4.3610    4.2924   -6.1577 C   0  0  0  0  0  0  0  0  0  0  0  0
   -5.1434    4.4901   -7.0570 O   0  0  0  0  0  0  0  0  0  0  0  0
   -2.9770    4.8857   -6.2189 C   0  0  0  0  0  0  0  0  0  0  0  0
   -8.4807    1.8803   -4.6816 N   0  3  0  0  0  0  0  0  0  0  0  0
   -9.3177    1.0100   -4.5220 O   0  0  0  0  0  0  0  0  0  0  0  0
   -8.3094    2.3653   -5.7857 O   0  5  0  0  0  0  0  0  0  0  0  0
  1  2  1  0      
  2  3  1  0      
  3  4  1  0      
  4  5  1  0      
  5  6  1  0      
  6  1  1  0      
  1  7  1  0      
  7  8  2  0      
  8  9  1  0      
  9 10  1  0      
 10  2  1  0      
  1 11  1  0      
  5 12  1  0      
  3 13  1  0      
  2 14  1  0      
 10 15  1  0      
  9 16  1  0      
  9 17  1  0      
 17 18  1  0      
 17 19  2  0      
 19 20  1  0      
 20 21  1  0      
 10 22  1  0      
 22 23  1  0      
 21 24  1  0      
 23 25  2  0      
 22 26  2  0      
 25 27  1  0      
 24 28  2  0      
 28 29  1  0      
 29 30  1  0      
 29 31  1  0      
 31 32  2  0      
 32 33  1  0      
 33 34  1  0      
 34 30  1  0      
 23 35  1  0      
 30 36  1  0      
 35 36  1  0      
 35 37  2  0      
 33 38  1  0      
 32 39  1  0      
 39 40  1  0      
 29 41  1  0      
 42 43  1  0      
 43 44  1  0      
 44 45  1  0      
 45 46  1  0      
 46 47  1  0      
 47 42  1  0      
 21 48  1  0      
 45 48  1  0      
 21 49  1  0      
 43 50  1  0      
 47 51  1  0      
 30 25  1  0      
  6 52  1  0      
 24 53  1  0      
 42 54  1  0      
 54 55  1  0      
 55 56  1  0      
 56 57  2  0      
 56 58  1  0      
 43 59  1  0      
 59 60  2  0      
 59 61  1  0      
M  CHG  2  59   1  61  -1
M  STY  1   1 SUP
M  SLB  1   1   1
M  SAL   1  5  54  55  56  57  58
M  SBL   1  1  59
M  SMT   1 NHOCOCH3
M  SBV   1 59   -7.6076    8.9337
M  STY  1   2 SUP
M  SLB  1   2   2
M  SAL   2  3  59  60  61
M  SBL   2  1  64
M  SMT   2 NO2
M  SBV   2 64   -7.6076    7.6970
M  END
$$$$
