# Supplementary material for: New Spirotetronate Antibiotics, Lobophorins H and I, from a South China Sea-Derived Streptomyces sp. 12A35
Source: MDPI journal article supplement (doi:10.3390/md11103891), 2013-10-15
Supplement: s7 [file s7]

marinedrugs-11-03891-s003.mol
  ChemDraw11081309312D

 61 66  0  0  0  0  0  0  0  0999 V2000
    2.1151    3.1792    0.0000 C   0  0  0  0  0  0  0  0  0  0  0  0
    2.1151    2.3542    0.0000 C   0  0  0  0  0  0  0  0  0  0  0  0
    2.8295    1.9417    0.0000 C   0  0  0  0  0  0  0  0  0  0  0  0
    3.5440    2.3542    0.0000 C   0  0  0  0  0  0  0  0  0  0  0  0
    3.5440    3.1792    0.0000 C   0  0  0  0  0  0  0  0  0  0  0  0
    2.8295    3.5917    0.0000 C   0  0  0  0  0  0  0  0  0  0  0  0
    1.4006    3.5917    0.0000 C   0  0  0  0  0  0  0  0  0  0  0  0
    0.6861    3.1792    0.0000 C   0  0  0  0  0  0  0  0  0  0  0  0
    0.6861    2.3542    0.0000 C   0  0  0  0  0  0  0  0  0  0  0  0
    1.4006    1.9417    0.0000 C   0  0  0  0  0  0  0  0  0  0  0  0
    2.1151    4.0042    0.0000 H   0  0  0  0  0  0  0  0  0  0  0  0
    4.2585    3.5917    0.0000 C   0  0  0  0  0  0  0  0  0  0  0  0
    2.8295    1.1167    0.0000 C   0  0  0  0  0  0  0  0  0  0  0  0
    2.1151    1.5292    0.0000 H   0  0  0  0  0  0  0  0  0  0  0  0
    1.1871    2.7386    0.0000 C   0  0  0  0  0  0  0  0  0  0  0  0
    0.6861    1.5292    0.0000 H   0  0  0  0  0  0  0  0  0  0  0  0
   -0.0283    1.9417    0.0000 C   0  0  0  0  0  0  0  0  0  0  0  0
   -0.6117    2.5250    0.0000 C   0  0  0  0  0  0  0  0  0  0  0  0
   -0.0283    1.1167    0.0000 C   0  0  0  0  0  0  0  0  0  0  0  0
   -0.6117    0.5333    0.0000 C   0  0  0  0  0  0  0  0  0  0  0  0
   -0.6117   -0.2917    0.0000 C   0  0  0  0  0  0  0  0  0  0  0  0
    1.4006    1.1167    0.0000 C   0  0  0  0  0  0  0  0  0  0  0  0
    2.0458    0.4773    0.0000 C   0  0  0  0  0  0  0  0  0  0  0  0
    0.1028   -0.7042    0.0000 C   0  0  0  0  0  0  0  0  0  0  0  0
    1.4064   -0.4508    0.0000 C   0  0  0  0  0  0  0  0  0  0  0  0
    0.9881    0.4022    0.0000 O   0  0  0  0  0  0  0  0  0  0  0  0
    0.9114   -0.1827    0.0000 O   0  0  0  0  0  0  0  0  0  0  0  0
    0.1028   -1.5292    0.0000 C   0  0  0  0  0  0  0  0  0  0  0  0
    0.8172   -1.9417    0.0000 C   0  0  0  0  0  0  0  0  0  0  0  0
    1.5317   -1.5292    0.0000 C   0  0  0  0  0  0  0  0  0  0  0  0
    0.8172   -2.7667    0.0000 C   0  0  0  0  0  0  0  0  0  0  0  0
    1.5317   -3.1792    0.0000 C   0  0  0  0  0  0  0  0  0  0  0  0
    2.2462   -2.7667    0.0000 C   0  0  0  0  0  0  0  0  0  0  0  0
    2.2462   -1.9417    0.0000 C   0  0  0  0  0  0  0  0  0  0  0  0
    2.9120    0.1473    0.0000 C   0  0  0  0  0  0  0  0  0  0  0  0
    2.6852   -0.9252    0.0000 O   0  0  0  0  0  0  0  0  0  0  0  0
    3.6265    0.5598    0.0000 O   0  0  0  0  0  0  0  0  0  0  0  0
    2.8295   -3.3500    0.0000 C   0  0  0  0  0  0  0  0  0  0  0  0
    1.5317   -4.0042    0.0000 C   0  0  0  0  0  0  0  0  0  0  0  0
    2.2462   -4.4167    0.0000 O   0  0  0  0  0  0  0  0  0  0  0  0
    0.1028   -2.3542    0.0000 H   0  0  0  0  0  0  0  0  0  0  0  0
   -3.8741    0.1073    0.0000 C   0  0  0  0  0  0  0  0  0  0  0  0
   -3.4616   -0.6072    0.0000 C   0  0  0  0  0  0  0  0  0  0  0  0
   -2.6635   -0.3981    0.0000 C   0  0  0  0  0  0  0  0  0  0  0  0
   -1.8703   -0.6072    0.0000 C   0  0  0  0  0  0  0  0  0  0  0  0
   -2.2827    0.1073    0.0000 O   0  0  0  0  0  0  0  0  0  0  0  0
   -3.0809   -0.1017    0.0000 C   0  0  0  0  0  0  0  0  0  0  0  0
   -1.4086   -0.0782    0.0000 O   0  0  0  0  0  0  0  0  0  0  0  0
   -1.0242   -1.0062    0.0000 H   0  0  0  0  0  0  0  0  0  0  0  0
   -4.2585   -0.3936    0.0000 C   0  0  0  0  0  0  0  0  0  0  0  0
   -3.4934    0.6128    0.0000 C   0  0  0  0  0  0  0  0  0  0  0  0
    2.8295    4.4167    0.0000 O   0  0  0  0  0  0  0  0  0  0  0  0
    0.3163    0.0927    0.0000 C   0  0  0  0  0  0  0  0  0  0  0  0
   -3.8750    0.5199    0.0000 N   0  0  0  0  0  0  0  0  0  0  0  0
   -3.1605    0.1074    0.0000 O   0  0  0  0  0  0  0  0  0  0  0  0
   -2.4460    0.5199    0.0000 C   0  0  0  0  0  0  0  0  0  0  0  0
   -2.4460    1.3449    0.0000 O   0  0  0  0  0  0  0  0  0  0  0  0
   -1.7315    0.1074    0.0000 C   0  0  0  0  0  0  0  0  0  0  0  0
   -3.4625   -1.4312    0.0000 N   0  3  0  0  0  0  0  0  0  0  0  0
   -2.7480   -1.8437    0.0000 O   0  0  0  0  0  0  0  0  0  0  0  0
   -4.1769   -1.8437    0.0000 O   0  5  0  0  0  0  0  0  0  0  0  0
  1  2  1  0      
  2  3  1  0      
  3  4  1  0      
  4  5  1  0      
  5  6  1  0      
  6  1  1  0      
  1  7  1  0      
  7  8  2  0      
  8  9  1  0      
  9 10  1  0      
 10  2  1  0      
  1 11  1  1      
  5 12  1  1      
  3 13  1  6      
  2 14  1  6      
 10 15  1  1      
  9 16  1  1      
  9 17  1  0      
 17 18  1  0      
 17 19  2  0      
 19 20  1  0      
 20 21  1  0      
 10 22  1  0      
 22 23  1  0      
 21 24  1  0      
 23 25  2  0      
 22 26  2  0      
 25 27  1  0      
 24 28  2  0      
 28 29  1  0      
 29 30  1  0      
 29 31  1  0      
 31 32  2  0      
 32 33  1  0      
 33 34  1  0      
 34 30  1  0      
 23 35  1  0      
 30 36  1  1      
 35 36  1  0      
 35 37  2  0      
 33 38  1  1      
 32 39  1  0      
 39 40  1  0      
 29 41  1  6      
 42 43  1  0      
 43 44  1  0      
 44 45  1  0      
 45 46  1  0      
 46 47  1  0      
 47 42  1  0      
 21 48  1  0      
 45 48  1  0      
 21 49  1  6      
 43 50  1  0      
 47 51  1  0      
 30 25  1  6      
  6 52  1  1      
 24 53  1  0      
 42 54  1  0      
 54 55  1  0      
 55 56  1  0      
 56 57  2  0      
 56 58  1  0      
 43 59  1  0      
 59 60  2  0      
 59 61  1  0      
M  CHG  2  59   1  61  -1
M  STY  1   1 SUP
M  SLB  1   1   1
M  SAL   1  5  54  55  56  57  58
M  SBL   1  1  59
M  SMT   1 NHOCOCH3
M  SBV   1 59   -7.6076    8.9337
M  STY  1   2 SUP
M  SLB  1   2   2
M  SAL   2  3  59  60  61
M  SBL   2  1  64
M  SMT   2 NO2
M  SBV   2 64   -7.6076    7.6970
M  END
