# Supplementary material for: New Spirotetronate Antibiotics, Lobophorins H and I, from a South China Sea-Derived Streptomyces sp. 12A35
Source: MDPI journal article supplement (doi:10.3390/md11103891), 2013-10-15
Supplement: s8 [file s8]

marinedrugs-11-03891-s005.mol
  corina  11211302053D 1   1.00000     0.00000 
CORINA 3.49 0023  12.04.2013
 78 85  0  0  0  0  0  0  0  0999 V2000
    4.4934    8.1321    4.4516 C   0  0  0  0  0  0  0  0  0  0  0  0
    3.4290    7.1257    4.8966 C   0  0  0  0  0  0  0  0  0  0  0  0
    2.9298    6.3485    3.6746 C   0  0  0  0  0  0  0  0  0  0  0  0
    4.1219    5.6704    2.9925 C   0  0  0  0  0  0  0  0  0  0  0  0
    5.1595    6.7330    2.6211 C   0  0  0  0  0  0  0  0  0  0  0  0
    5.5584    7.4391    3.7977 O   0  0  0  0  0  0  0  0  0  0  0  0
    7.9797    6.4048    0.3350 C   0  0  0  0  0  0  0  0  0  0  0  0
    9.0854    7.3108   -0.2191 C   0  0  0  0  0  0  0  0  0  0  0  0
   10.0765    7.5968    0.9126 C   0  0  0  0  0  0  0  0  0  0  0  0
    9.3680    8.2368    2.1125 C   0  0  0  0  0  0  0  0  0  0  0  0
    8.2811    7.3204    2.6601 C   0  0  0  0  0  0  0  0  0  0  0  0
    7.2848    7.0166    1.5470 C   0  0  0  0  0  0  0  0  0  0  0  0
    6.9348    6.2638   -0.7524 C   0  0  0  0  0  0  0  0  0  0  0  0
    7.3563    6.1523   -1.9688 C   0  0  0  0  0  0  0  0  0  0  0  0
    8.7509    6.1811   -2.4430 C   0  0  0  0  0  0  0  0  0  0  0  0
    9.7650    6.6602   -1.4132 C   0  0  0  0  0  0  0  0  0  0  0  0
    6.2995    6.1015    2.0348 O   0  0  0  0  0  0  0  0  0  0  0  0
    8.3653    5.4218    0.5760 H   0  0  0  0  0  0  0  0  0  0  0  0
    1.9892    5.3564    4.0907 O   0  0  0  0  0  0  0  0  0  0  0  0
    3.8699    9.1396    3.4835 C   0  0  0  0  0  0  0  0  0  0  0  0
    3.9969    6.2164    5.8415 O   0  0  0  0  0  0  0  0  0  0  0  0
    8.8776    6.0310    3.2186 C   0  0  0  0  0  0  0  0  0  0  0  0
   11.1747    8.5827    0.4979 C   0  0  0  0  0  0  0  0  0  0  0  0
    8.6313    8.2599   -0.5289 H   0  0  0  0  0  0  0  0  0  0  0  0
   10.5538    5.4376   -0.9205 C   0  0  0  0  0  0  0  0  0  0  0  0
    9.0333    5.1441   -2.7105 H   0  0  0  0  0  0  0  0  0  0  0  0
    8.8119    6.9835   -3.7167 C   0  0  0  0  0  0  0  0  0  0  0  0
    7.8618    8.1406   -3.9153 C   0  0  0  0  0  0  0  0  0  0  0  0
    9.6637    6.6757   -4.6683 C   0  0  0  0  0  0  0  0  0  0  0  0
    9.6965    7.4580   -5.9525 C   0  0  0  0  0  0  0  0  0  0  0  0
   10.8386    6.9948   -6.8592 C   0  0  0  0  0  0  0  0  0  0  0  0
   10.6793    7.6368   -2.0979 C   0  0  0  0  0  0  0  0  0  0  0  0
   11.9996    7.3680   -2.6343 C   0  0  0  0  0  0  0  0  0  0  0  0
   12.0857    7.7677   -6.4870 C   0  0  0  0  0  0  0  0  0  0  0  0
   12.8735    8.4143   -2.9679 C   0  0  0  0  0  0  0  0  0  0  0  0
   10.2658    8.7885   -2.2340 O   0  0  0  0  0  0  0  0  0  0  0  0
   12.6435    9.7238   -2.8109 O   0  0  0  0  0  0  0  0  0  0  0  0
   12.8876    7.2739   -5.5889 C   0  0  0  0  0  0  0  0  0  0  0  0
   14.1152    7.9791   -5.0825 C   0  0  0  0  0  0  0  0  0  0  0  0
   14.1094    7.7796   -3.5517 C   0  0  0  0  0  0  0  0  0  0  0  0
   15.3572    7.3569   -5.6440 C   0  0  0  0  0  0  0  0  0  0  0  0
   16.4471    7.2538   -4.9465 C   0  0  0  0  0  0  0  0  0  0  0  0
   16.6237    7.7285   -3.5420 C   0  0  0  0  0  0  0  0  0  0  0  0
   15.3736    8.3695   -2.9570 C   0  0  0  0  0  0  0  0  0  0  0  0
   12.6840    6.1236   -2.9650 C   0  0  0  0  0  0  0  0  0  0  0  0
   13.9816    6.3626   -3.2716 O   0  0  0  0  0  0  0  0  0  0  0  0
   12.2039    5.0104   -3.0430 O   0  0  0  0  0  0  0  0  0  0  0  0
   17.0525    6.5532   -2.6609 C   0  0  0  0  0  0  0  0  0  0  0  0
   17.6300    6.5953   -5.6125 C   0  0  0  0  0  0  0  0  0  0  0  0
   14.0920    9.0389   -5.2837 H   0  0  0  0  0  0  0  0  0  0  0  0
    8.3738    2.6728   -8.0027 C   0  0  0  0  0  0  0  0  0  0  0  0
    9.8497    2.4425   -8.3417 C   0  0  0  0  0  0  0  0  0  0  0  0
   10.7145    3.3162   -7.4277 C   0  0  0  0  0  0  0  0  0  0  0  0
   10.3016    4.7808   -7.5950 C   0  0  0  0  0  0  0  0  0  0  0  0
    8.9115    4.9198   -7.2943 O   0  0  0  0  0  0  0  0  0  0  0  0
    8.0513    4.1623   -8.1477 C   0  0  0  0  0  0  0  0  0  0  0  0
   11.0657    5.5961   -6.7041 O   0  0  0  0  0  0  0  0  0  0  0  0
   10.5865    7.2056   -7.9005 H   0  0  0  0  0  0  0  0  0  0  0  0
   10.2011    0.9694   -8.1238 C   0  0  0  0  0  0  0  0  0  0  0  0
    8.2666    4.5919   -9.6003 C   0  0  0  0  0  0  0  0  0  0  0  0
   -0.4090    3.1019    1.5130 C   0  0  0  0  0  0  0  0  0  0  0  0
    0.6889    4.0195    0.9685 C   0  0  0  0  0  0  0  0  0  0  0  0
    1.5962    4.3513    2.0215 O   0  0  0  0  0  0  0  0  0  0  0  0
    0.9939    5.0522    3.1115 C   0  0  0  0  0  0  0  0  0  0  0  0
   -0.0917    4.1761    3.7421 C   0  0  0  0  0  0  0  0  0  0  0  0
   -1.1228    3.8048    2.6719 C   0  0  0  0  0  0  0  0  0  0  0  0
   -1.7614    4.9896    2.1918 O   0  0  0  0  0  0  0  0  0  0  0  0
   -1.3497    2.8154    0.4762 O   0  0  0  0  0  0  0  0  0  0  0  0
    1.4461    3.3009   -0.1500 C   0  0  0  0  0  0  0  0  0  0  0  0
   12.3645    9.0763   -7.1797 C   0  0  0  0  0  0  0  0  0  0  0  0
    7.5319    1.8964   -8.9226 N   0  0  0  0  0  0  0  0  0  0  0  0
    6.4152    1.5435   -8.3491 O   0  0  0  0  0  0  0  0  0  0  0  0
    5.5523    0.8258   -9.0853 C   0  0  0  0  0  0  0  0  0  0  0  0
    5.8269    0.5354  -10.2256 O   0  0  0  0  0  0  0  0  0  0  0  0
    4.2411    0.3821   -8.4896 C   0  0  0  0  0  0  0  0  0  0  0  0
   10.0937    2.8047   -9.7401 N   0  3  0  0  0  0  0  0  0  0  0  0
   10.9875    3.5830  -10.0206 O   0  0  0  0  0  0  0  0  0  0  0  0
    9.4027    2.3274  -10.6222 O   0  5  0  0  0  0  0  0  0  0  0  0
  1  2  1  0      
  2  3  1  0      
  3  4  1  0      
  4  5  1  0      
  5  6  1  0      
  6  1  1  0      
  7  8  1  0      
  8  9  1  0      
  9 10  1  0      
 10 11  1  0      
 11 12  1  0      
 12  7  1  0      
  7 13  1  0      
 13 14  2  0      
 14 15  1  0      
 15 16  1  0      
 16  8  1  0      
  5 17  1  0      
  7 18  1  0      
  3 19  1  0      
  1 20  1  0      
  2 21  1  0      
 12 17  1  0      
 11 22  1  0      
  9 23  1  0      
  8 24  1  0      
 16 25  1  0      
 15 26  1  0      
 15 27  1  0      
 27 28  1  0      
 27 29  2  0      
 29 30  1  0      
 30 31  1  0      
 16 32  1  0      
 32 33  1  0      
 31 34  1  0      
 33 35  2  0      
 32 36  2  0      
 35 37  1  0      
 34 38  2  0      
 38 39  1  0      
 39 40  1  0      
 39 41  1  0      
 41 42  2  0      
 42 43  1  0      
 43 44  1  0      
 44 40  1  0      
 33 45  1  0      
 40 46  1  0      
 45 46  1  0      
 45 47  2  0      
 43 48  1  0      
 42 49  1  0      
 39 50  1  0      
 51 52  1  0      
 52 53  1  0      
 53 54  1  0      
 54 55  1  0      
 55 56  1  0      
 56 51  1  0      
 31 57  1  0      
 54 57  1  0      
 31 58  1  0      
 52 59  1  0      
 56 60  1  0      
 40 35  1  0      
 61 62  1  0      
 62 63  1  0      
 63 64  1  0      
 64 65  1  0      
 65 66  1  0      
 66 61  1  0      
 64 19  1  0      
 66 67  1  0      
 61 68  1  0      
 62 69  1  0      
 34 70  1  0      
 51 71  1  0      
 71 72  1  0      
 72 73  1  0      
 73 74  2  0      
 73 75  1  0      
 52 76  1  0      
 76 77  2  0      
 76 78  1  0      
M  CHG  2  76   1  78  -1
M  STY  1   1 SUP
M  SLB  1   1   1
M  SAL   1  5  71  72  73  74  75
M  SBL   1  1  78
M  SMT   1 NHOCOCH3
M  SBV   1 78   -7.6076    7.8399
M  STY  1   2 SUP
M  SLB  1   2   2
M  SAL   2  3  76  77  78
M  SBL   2  1  83
M  SMT   2 NO2
M  SBV   2 83   -7.6076    6.6033
M  END
$$$$
