# Supplementary material for: New Spirotetronate Antibiotics, Lobophorins H and I, from a South China Sea-Derived Streptomyces sp. 12A35
Source: MDPI journal article supplement (doi:10.3390/md11103891), 2013-10-15
Supplement: s9 [file s9]

marinedrugs-11-03891-s005.mol
  ChemDraw11081309322D

 78 85  0  0  0  0  0  0  0  0999 V2000
    0.3334    3.5898    0.0000 C   0  0  0  0  0  0  0  0  0  0  0  0
   -0.0791    2.8754    0.0000 C   0  0  0  0  0  0  0  0  0  0  0  0
    0.7141    3.1021    0.0000 C   0  0  0  0  0  0  0  0  0  0  0  0
    1.5122    2.8754    0.0000 C   0  0  0  0  0  0  0  0  0  0  0  0
    1.9248    3.5898    0.0000 C   0  0  0  0  0  0  0  0  0  0  0  0
    1.1315    3.3632    0.0000 O   0  0  0  0  0  0  0  0  0  0  0  0
    2.1151    2.0854    0.0000 C   0  0  0  0  0  0  0  0  0  0  0  0
    2.1151    1.2604    0.0000 C   0  0  0  0  0  0  0  0  0  0  0  0
    2.8295    0.8479    0.0000 C   0  0  0  0  0  0  0  0  0  0  0  0
    3.5440    1.2604    0.0000 C   0  0  0  0  0  0  0  0  0  0  0  0
    3.5440    2.0854    0.0000 C   0  0  0  0  0  0  0  0  0  0  0  0
    2.8295    2.4979    0.0000 C   0  0  0  0  0  0  0  0  0  0  0  0
    1.4006    2.4979    0.0000 C   0  0  0  0  0  0  0  0  0  0  0  0
    0.6861    2.0854    0.0000 C   0  0  0  0  0  0  0  0  0  0  0  0
    0.6861    1.2604    0.0000 C   0  0  0  0  0  0  0  0  0  0  0  0
    1.4006    0.8479    0.0000 C   0  0  0  0  0  0  0  0  0  0  0  0
    1.9248    4.4148    0.0000 O   0  0  0  0  0  0  0  0  0  0  0  0
    2.1151    2.9104    0.0000 H   0  0  0  0  0  0  0  0  0  0  0  0
    0.7141    3.9271    0.0000 O   0  0  0  0  0  0  0  0  0  0  0  0
   -0.4635    3.3763    0.0000 C   0  0  0  0  0  0  0  0  0  0  0  0
   -0.8760    3.0889    0.0000 O   0  0  0  0  0  0  0  0  0  0  0  0
    4.2585    2.4979    0.0000 C   0  0  0  0  0  0  0  0  0  0  0  0
    2.8295    0.0229    0.0000 C   0  0  0  0  0  0  0  0  0  0  0  0
    2.1151    0.4354    0.0000 H   0  0  0  0  0  0  0  0  0  0  0  0
    1.1871    1.6448    0.0000 C   0  0  0  0  0  0  0  0  0  0  0  0
    0.6861    0.4354    0.0000 H   0  0  0  0  0  0  0  0  0  0  0  0
   -0.0283    0.8479    0.0000 C   0  0  0  0  0  0  0  0  0  0  0  0
   -0.6117    1.4313    0.0000 C   0  0  0  0  0  0  0  0  0  0  0  0
   -0.0283    0.0229    0.0000 C   0  0  0  0  0  0  0  0  0  0  0  0
   -0.6117   -0.5604    0.0000 C   0  0  0  0  0  0  0  0  0  0  0  0
   -0.6117   -1.3854    0.0000 C   0  0  0  0  0  0  0  0  0  0  0  0
    1.4006    0.0229    0.0000 C   0  0  0  0  0  0  0  0  0  0  0  0
    2.0458   -0.6165    0.0000 C   0  0  0  0  0  0  0  0  0  0  0  0
    0.1028   -1.7979    0.0000 C   0  0  0  0  0  0  0  0  0  0  0  0
    1.4064   -1.5446    0.0000 C   0  0  0  0  0  0  0  0  0  0  0  0
    0.9881   -0.6915    0.0000 O   0  0  0  0  0  0  0  0  0  0  0  0
    0.9114   -1.2765    0.0000 O   0  0  0  0  0  0  0  0  0  0  0  0
    0.1028   -2.6229    0.0000 C   0  0  0  0  0  0  0  0  0  0  0  0
    0.8172   -3.0354    0.0000 C   0  0  0  0  0  0  0  0  0  0  0  0
    1.5317   -2.6229    0.0000 C   0  0  0  0  0  0  0  0  0  0  0  0
    0.8172   -3.8604    0.0000 C   0  0  0  0  0  0  0  0  0  0  0  0
    1.5317   -4.2729    0.0000 C   0  0  0  0  0  0  0  0  0  0  0  0
    2.2462   -3.8604    0.0000 C   0  0  0  0  0  0  0  0  0  0  0  0
    2.2462   -3.0354    0.0000 C   0  0  0  0  0  0  0  0  0  0  0  0
    2.9120   -0.9465    0.0000 C   0  0  0  0  0  0  0  0  0  0  0  0
    2.6852   -2.0190    0.0000 O   0  0  0  0  0  0  0  0  0  0  0  0
    3.6265   -0.5340    0.0000 O   0  0  0  0  0  0  0  0  0  0  0  0
    2.8295   -4.4438    0.0000 C   0  0  0  0  0  0  0  0  0  0  0  0
    1.5317   -5.0979    0.0000 C   0  0  0  0  0  0  0  0  0  0  0  0
    0.1028   -3.4479    0.0000 H   0  0  0  0  0  0  0  0  0  0  0  0
   -3.8741   -0.9864    0.0000 C   0  0  0  0  0  0  0  0  0  0  0  0
   -3.4616   -1.7009    0.0000 C   0  0  0  0  0  0  0  0  0  0  0  0
   -2.6635   -1.4918    0.0000 C   0  0  0  0  0  0  0  0  0  0  0  0
   -1.8703   -1.7009    0.0000 C   0  0  0  0  0  0  0  0  0  0  0  0
   -2.2827   -0.9864    0.0000 O   0  0  0  0  0  0  0  0  0  0  0  0
   -3.0809   -1.1954    0.0000 C   0  0  0  0  0  0  0  0  0  0  0  0
   -1.4086   -1.1719    0.0000 O   0  0  0  0  0  0  0  0  0  0  0  0
   -1.0242   -2.0999    0.0000 H   0  0  0  0  0  0  0  0  0  0  0  0
   -4.2585   -1.4874    0.0000 C   0  0  0  0  0  0  0  0  0  0  0  0
   -3.4934   -0.4810    0.0000 C   0  0  0  0  0  0  0  0  0  0  0  0
   -1.8116    5.0979    0.0000 C   0  0  0  0  0  0  0  0  0  0  0  0
   -1.3991    4.3835    0.0000 C   0  0  0  0  0  0  0  0  0  0  0  0
   -0.6010    4.5926    0.0000 O   0  0  0  0  0  0  0  0  0  0  0  0
    0.1922    4.3835    0.0000 C   0  0  0  0  0  0  0  0  0  0  0  0
   -0.2202    5.0979    0.0000 C   0  0  0  0  0  0  0  0  0  0  0  0
   -1.0184    4.8889    0.0000 C   0  0  0  0  0  0  0  0  0  0  0  0
   -1.0184    4.0639    0.0000 O   0  0  0  0  0  0  0  0  0  0  0  0
   -2.3950    4.5146    0.0000 O   0  0  0  0  0  0  0  0  0  0  0  0
   -2.2241    4.3835    0.0000 C   0  0  0  0  0  0  0  0  0  0  0  0
    0.3163   -1.0010    0.0000 C   0  0  0  0  0  0  0  0  0  0  0  0
   -3.8750   -0.5738    0.0000 N   0  0  0  0  0  0  0  0  0  0  0  0
   -3.1605   -0.9863    0.0000 O   0  0  0  0  0  0  0  0  0  0  0  0
   -2.4460   -0.5738    0.0000 C   0  0  0  0  0  0  0  0  0  0  0  0
   -2.4460    0.2512    0.0000 O   0  0  0  0  0  0  0  0  0  0  0  0
   -1.7315   -0.9863    0.0000 C   0  0  0  0  0  0  0  0  0  0  0  0
   -3.4625   -2.5250    0.0000 N   0  3  0  0  0  0  0  0  0  0  0  0
   -2.7480   -2.9375    0.0000 O   0  0  0  0  0  0  0  0  0  0  0  0
   -4.1769   -2.9375    0.0000 O   0  5  0  0  0  0  0  0  0  0  0  0
  1  2  1  0      
  2  3  1  0      
  3  4  1  0      
  4  5  1  0      
  5  6  1  0      
  6  1  1  0      
  7  8  1  0      
  8  9  1  0      
  9 10  1  0      
 10 11  1  0      
 11 12  1  0      
 12  7  1  0      
  7 13  1  0      
 13 14  2  0      
 14 15  1  0      
 15 16  1  0      
 16  8  1  0      
  5 17  1  1      
  7 18  1  1      
  3 19  1  0      
  1 20  1  0      
  2 21  1  0      
 12 17  1  1      
 11 22  1  1      
  9 23  1  6      
  8 24  1  6      
 16 25  1  1      
 15 26  1  1      
 15 27  1  0      
 27 28  1  0      
 27 29  2  0      
 29 30  1  0      
 30 31  1  0      
 16 32  1  0      
 32 33  1  0      
 31 34  1  0      
 33 35  2  0      
 32 36  2  0      
 35 37  1  0      
 34 38  2  0      
 38 39  1  0      
 39 40  1  0      
 39 41  1  0      
 41 42  2  0      
 42 43  1  0      
 43 44  1  0      
 44 40  1  0      
 33 45  1  0      
 40 46  1  1      
 45 46  1  0      
 45 47  2  0      
 43 48  1  1      
 42 49  1  0      
 39 50  1  6      
 51 52  1  0      
 52 53  1  0      
 53 54  1  0      
 54 55  1  0      
 55 56  1  0      
 56 51  1  0      
 31 57  1  0      
 54 57  1  0      
 31 58  1  6      
 52 59  1  0      
 56 60  1  0      
 40 35  1  6      
 61 62  1  0      
 62 63  1  0      
 63 64  1  0      
 64 65  1  0      
 65 66  1  0      
 66 61  1  0      
 64 19  1  0      
 66 67  1  0      
 61 68  1  0      
 62 69  1  0      
 34 70  1  0      
 51 71  1  0      
 71 72  1  0      
 72 73  1  0      
 73 74  2  0      
 73 75  1  0      
 52 76  1  0      
 76 77  2  0      
 76 78  1  0      
M  CHG  2  76   1  78  -1
M  STY  1   1 SUP
M  SLB  1   1   1
M  SAL   1  5  71  72  73  74  75
M  SBL   1  1  78
M  SMT   1 NHOCOCH3
M  SBV   1 78   -7.6076    7.8399
M  STY  1   2 SUP
M  SLB  1   2   2
M  SAL   2  3  76  77  78
M  SBL   2  1  83
M  SMT   2 NO2
M  SBV   2 83   -7.6076    6.6033
M  END
